# Supplementary material
Source: Springer Nature journal article supplement (https://www.springermedizin.de/resource/supplementary/12985_2012_2009_MOESM3_ESM.pdf/9610754)

CP

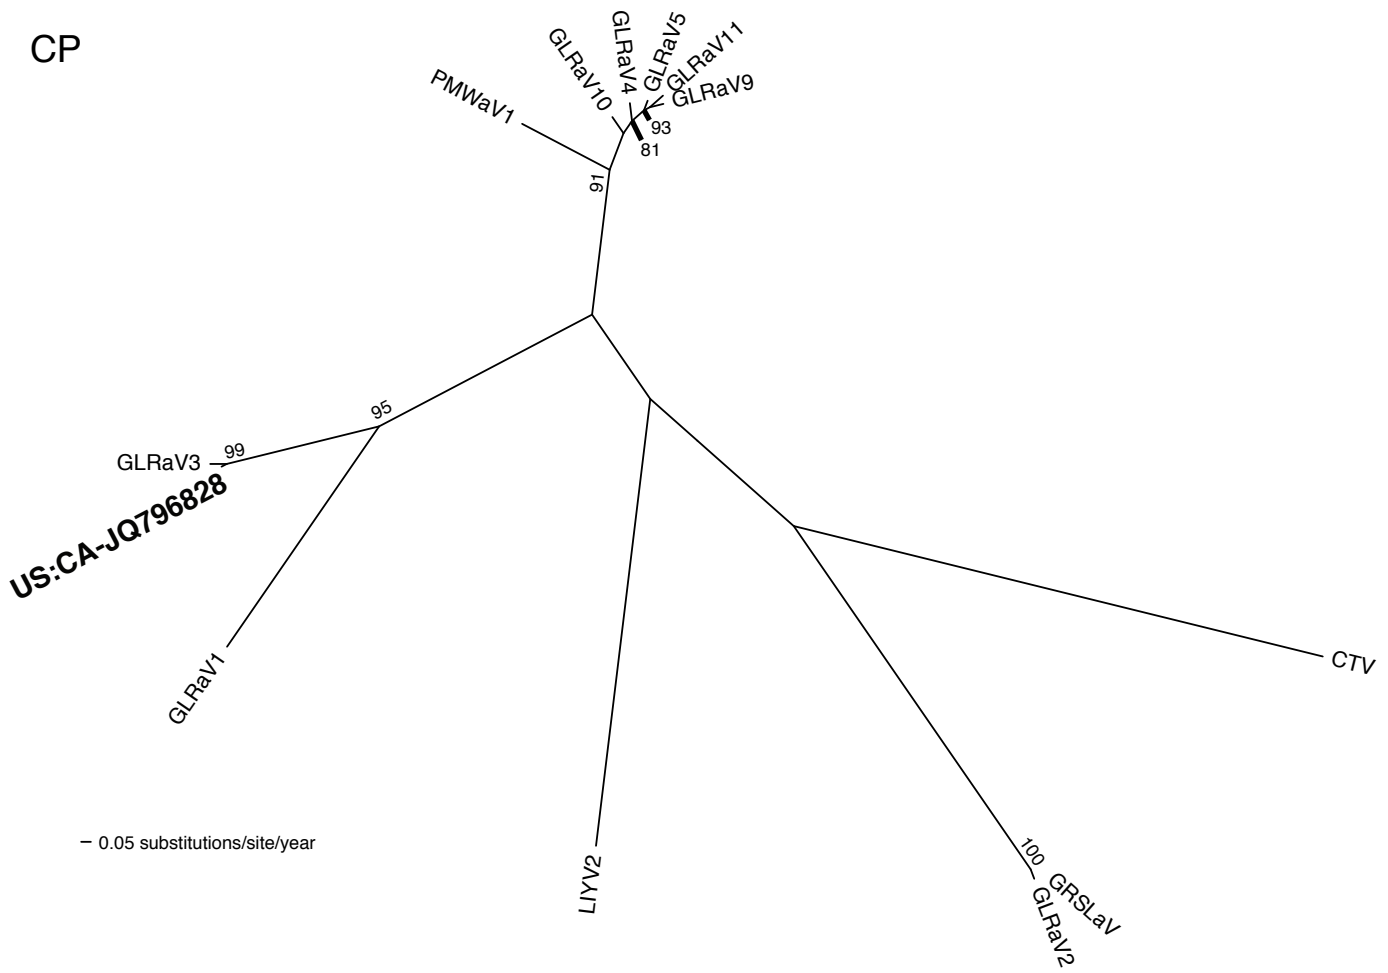

HSP70h

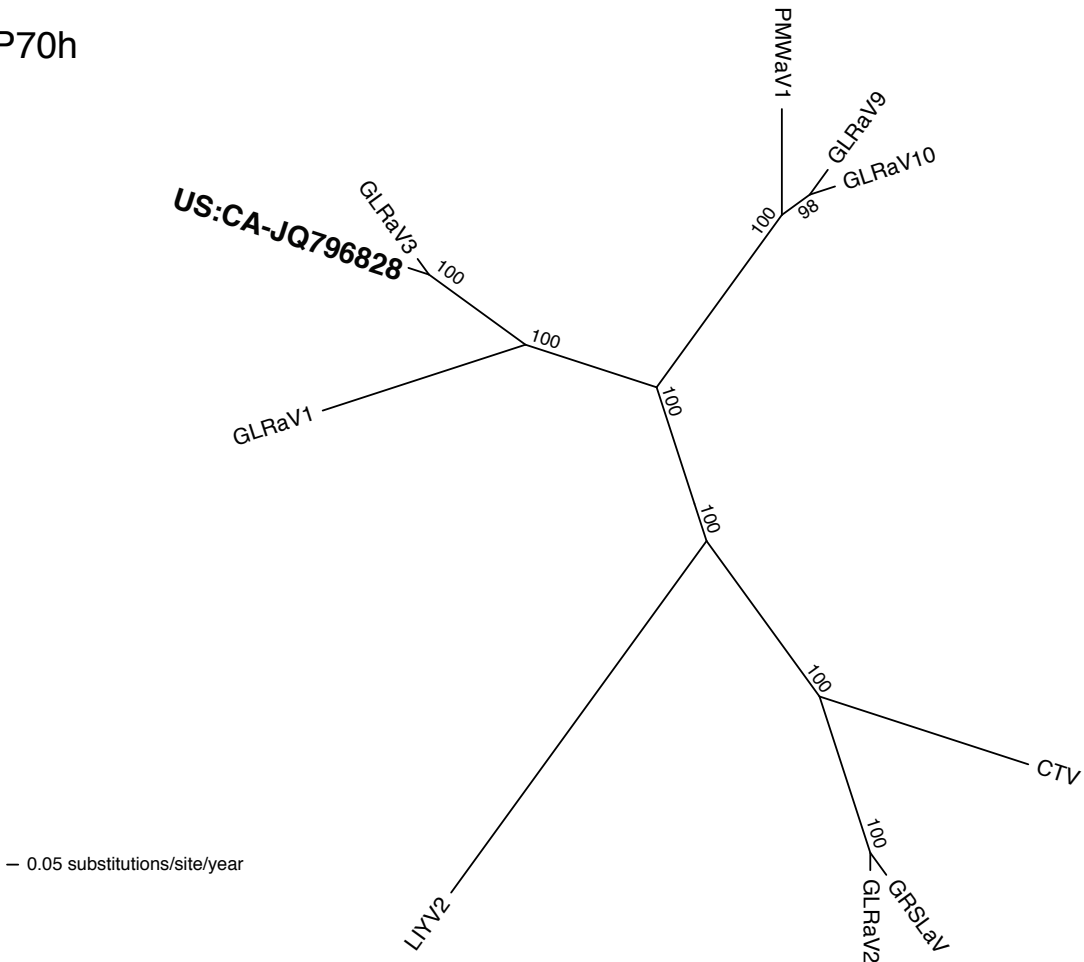

Supplement: MOESM3 [file 9610754]
